# Supplementary material for: Impact of Molecular Diagnostics for Tuberculosis on Patient-Important Outcomes: A Systematic Review of Study Methodologies
Source: PubMed Central journal article supplement (PMC4783056; doi:10.1371/journal.pone.0151073), 2016-03-08
Supplement: pone.0151073.s004.pdf [file pone.0151073.s004.pdf]

## RCTs

|                 | Random sequence generation | Allocation concealment | Blinding | Incomplete outcome data | Selective reporting | Other bias |
|-----------------|----------------------------|------------------------|----------|-------------------------|---------------------|------------|
| Theron 2013     |                            |                        |          |                         |                     |            |
| Mupfumi 2014    |                            |                        |          |                         |                     |            |
| Cox 2014        |                            |                        |          |                         |                     |            |
| Durovni 2014    |                            |                        |          |                         |                     |            |
| Churchyard 2015 |                            |                        |          |                         |                     |            |

## Pre/post implementation studies

|               | Patient sampling | Selection criteria | Exchangeability | Time trends | Incomplete outcome data |
|---------------|------------------|--------------------|-----------------|-------------|-------------------------|
| Boehme 2011   | +                | +                  | -               | -           | ?                       |
| Skenders 2011 | +                | +                  | -               | -           | -                       |
| Hanrahan 2012 | +                | -                  | -               | -           | -                       |
| Yoon 2012     | +                | +                  | -               | -           | +                       |
| Jacobson 2012 | +                | +                  | -               | +           | +                       |
| Singla 2014   | +                | -                  | -               | -           | -                       |
| Naidoo 2014   | +                | -                  | -               | +           | +                       |
| Kipiani 2014  | +                | +                  | -               | -           | -                       |
| Cox 2015      | +                | -                  | -               | +           | +                       |

## Single-cohort hypothetical studies

|                 | Patient sampling | Non-selective testing | Assumptions | Incomplete outcome data |
|-----------------|------------------|-----------------------|-------------|-------------------------|
| Chaisson 2014   | +                | +                     | +           | +                       |
| Sohn 2014       | +                | +                     | -           | +                       |
| Lippincott 2014 | +                | +                     | +           | -                       |
| Davis 2014      | +                | +                     | +           | +                       |

## Single-cohort observational studies

|                  | Patient sampling | Non-selective testing | Assumptions | Incomplete outcome data |
|------------------|------------------|-----------------------|-------------|-------------------------|
| Balcells 2012    | +                | +                     | -           | +                       |
| Lyu2013          | +                | +                     | -           | ?                       |
| Van Rie2013      | +                | +                     | -           | +                       |
| Hanrahan<br>2013 | +                | +                     | -           | -                       |
| Kwak 2013        | +                | +                     | -           | -                       |
| Ramirez 2014     | +                | +                     | -           | ?                       |
| Cohen 2014       | +                | -                     | -           | -                       |
